# Supplementary material
Source: PubMed Central journal article supplement (PMC5820194)
Supplement: NIHMS923428-supplement-Supp_FigS2.pdf [file NIHMS923428-supplement-Supp_FigS2.pdf]

Model Confidence is crucial for conveying a model's utility to the user. We have included the underlying data distributions of the target value IDDT vs the observed B-factors for the CAMEO servers.

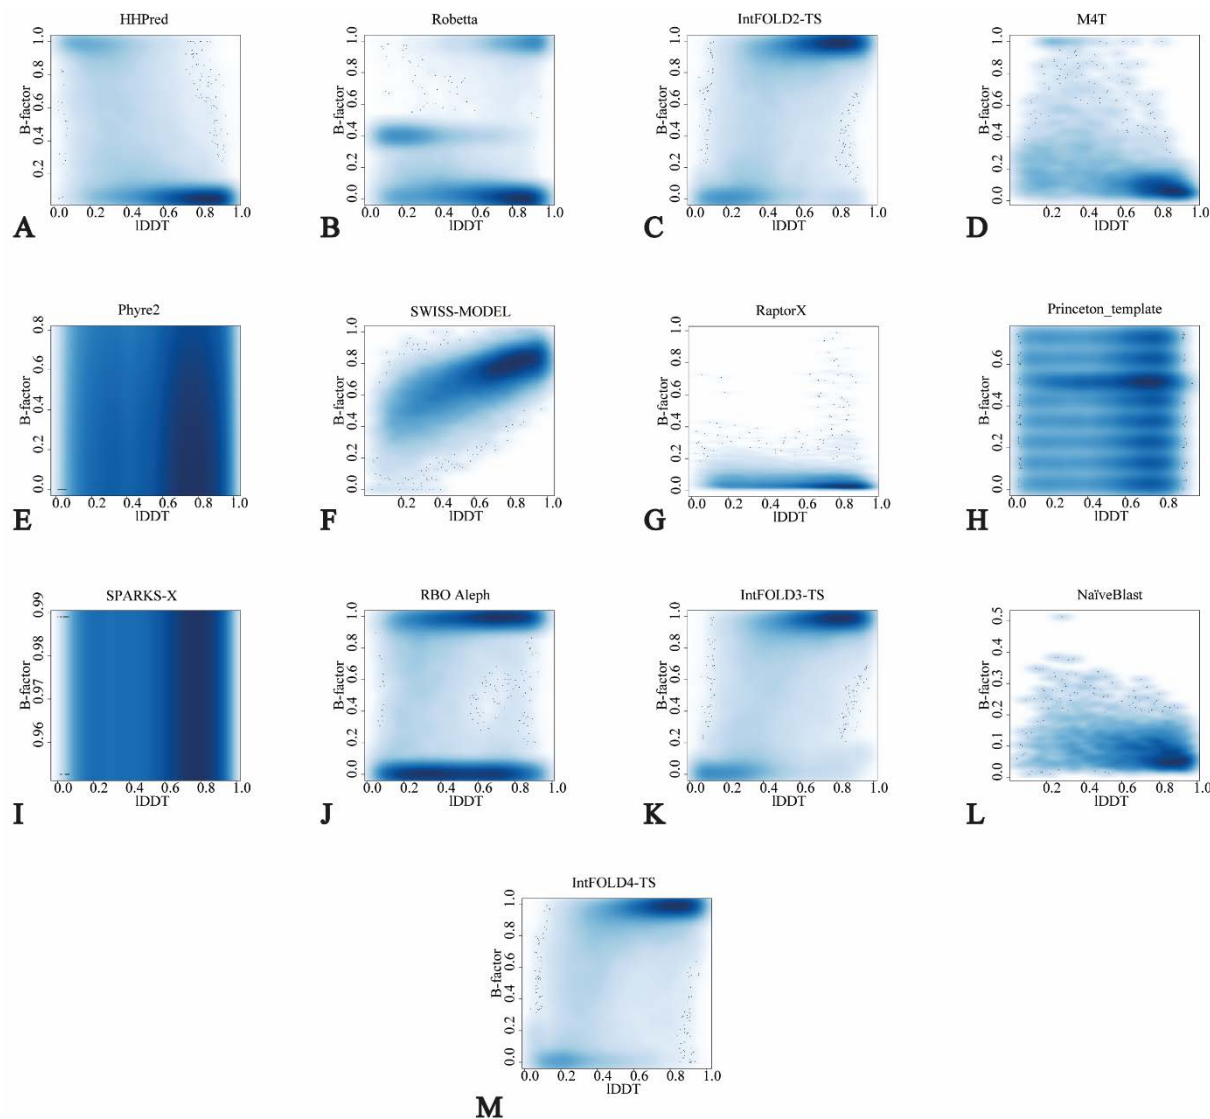

Figure S2 Underlying model confidence data distributions for Fig. 2 for all public servers (A-M) at the time. The discrepancies in performance are explained by the way model confidence is assigned, as some distributions (panels E and I) are a very broad leading to a low performance. The best performing servers differ by either focusing on the extreme region or continuous estimates (panels C, K, M vs panel F). Data was generated matching the CASP12 prediction time range 2016-05-01 – 2016-07-30. Model confidences have been normalized. Plot was created with R and Adobe Illustrator CC.
