# Supplementary material
Source: PubMed Central journal article supplement (PMC5820194)
Supplement: NIHMS923428-supplement-Supp_FigS3.pdf [file NIHMS923428-supplement-Supp_FigS3.pdf]

Figure S3: Investigating C $\alpha$  distance based scoring approaches in the context of automated evaluations

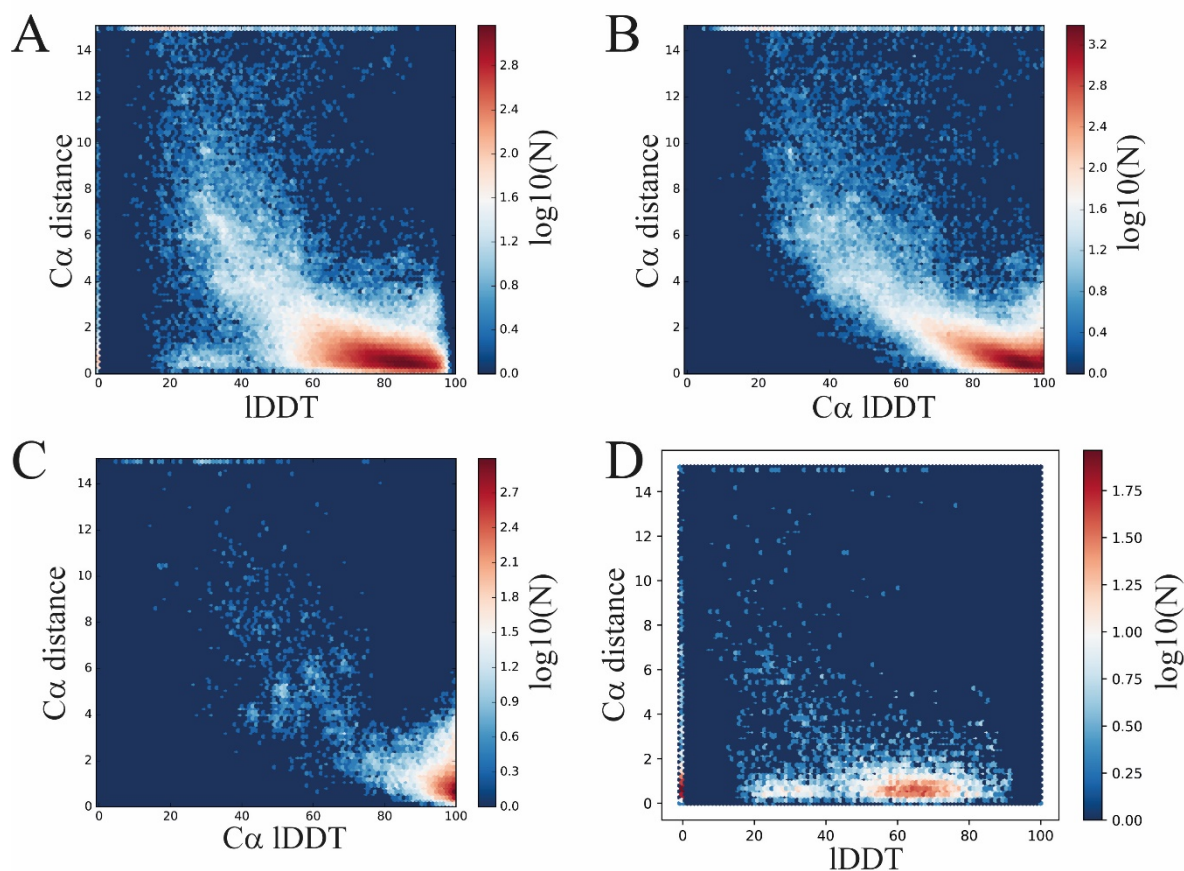

Figure S3 Evaluating high quality models based on a superposition-dependent global score in the context of fully automated evaluations: We were in particular focusing on robustly assessing domain orientations and have, thus, selected a subset of CASP12 models with GDT-TS > 80, resulting in a total of 901 of originally 10771 models on which we have carried out further analysis. The results emphasize the need for a sensitive superposition-independent score. We have exemplarily employed I/DDT, an all-atom score accounting for low quality sidechain orientations and stereochemical violations.

**Panel A** - even for models exhibiting a high GDT-TS, a low C $\alpha$  distance does not imply a high per-residue I/DDT score. Observed I/DDT scores are smeared out over a wide range, from around 20 to close to 100, please note the outliers with I/DDT scores of 0, resulting from excluded sidechain atoms by the stereochemistry filter (see Panel D). **Panel B** - Calculating the I/DDT score based on C $\alpha$  atoms, the correlation with C $\alpha$  distances improves. Low scores due to sidechains aberrations disappear (I/DDT between 20 and 40 with C $\alpha$  distances below 2 Å). **Panel C** - Increased C $\alpha$  distances are observed for the 71 models of target T0903 (pdb id 5a7d) stemming from minor twisting motions based on a superposition based analysis. Yet these minor discrepancies do not account for the poor match in panel A, which are most likely arising from sidechains that are either badly modelled or stereochemically problematic. **Panel D** - Reduced I/DDT scores are observed in 30 models of tertiary structure prediction server TS421. Residues with large stereochemical deviations and physically impossible close contacts are assigned low scores by I/DDT.
