# Supplementary material
Source: PubMed Central journal article supplement (PMC5820194)
Supplement: NIHMS923428-supplement-Supp_TableS1.pdf [file NIHMS923428-supplement-Supp_TableS1.pdf]

Table S1: CAMEO IDDT based ranking for the time frame 2016-05-01 - 2016-07-30. All public servers at the time are shown. Performances have been analyzed according to target difficulties.

| Server Name        | IDDT (all Targets) |
|--------------------|--------------------|
| Robetta            | 65.3 ±16.45        |
| RaptorX            | 63.8±16.57         |
| IntFOLD3-TS**      | 62.2±17.53         |
| IntFOLD4-TS        | 62.0 ±16.32        |
| SWISS-MODEL        | 56.5±22.49         |
| SPARKS-X           | 56.3±18.25         |
| Princeton_template | 55.6±15.68         |
| IntFOLD2-TS**      | 55.1±17.47         |
| HHpredB*           | 47.6±17.41         |
| M4T**              | 45.1±16.74         |
| Phyre2**           | 44.5 ±23.135       |
| NaiveBLAST**       | 43.3±25.59         |
| RBO Aleph*         | 38.6±16.28         |

\* method had technical problems during the CASP12 season, leading to suboptimal or missing data.

\*\* Method is not reflecting the current development and shown in CAMEO for historic comparison.

Table S1 – A: Performance by IDDT for hard targets

| Server Name        | IDDT (Hard Targets) |
|--------------------|---------------------|
| Robetta            | 46.7±13.16          |
| RaptorX            | 43.6±12.28          |
| IntFOLD3-TS**      | 41.1±12.54          |
| IntFOLD4-TS        | 40.7±11.91          |
| Princeton_template | 37.9±11.17          |
| SPARKS-X           | 36.1±11.98          |
| IntFOLD2-TS**      | 35.4±11.65          |
| HHpredB*           | 28.5±11.41          |
| SWISS-MODEL        | 28.5±13.82          |
| RBO Aleph*         | 25.9±11.90          |
| Phyre2**           | 21.1±14.38          |
| M4T**              | 14.2±11.94          |
| NaiveBLAST**       | 11.6±15.20          |

Table S1 – C: Performance by IDDT for medium targets

| Server Name        | IDDT (Medium Targets) |
|--------------------|-----------------------|
| Robetta            | 69.5±7.57             |
| RaptorX            | 69.1±8.42             |
| IntFOLD3-TS**      | 67.9±8.89             |
| IntFOLD4-TS        | 67.9±7.74             |
| SWISS-MODEL        | 63.1±10.52            |
| IntFOLD2-TS**      | 60.8±9.79             |
| Princeton_template | 60.7±10.00            |
| SPARKS-X           | 60.6±10.05            |
| HHpredB*           | 54.2±9.41             |
| M4T**              | 51.4±9.79             |
| NaiveBLAST**       | 50.9±16.46            |
| Phyre2**           | 49.8±12.18            |
| RBO Aleph*         | 42.7±13.02            |

Table S1 – D: Performance by IDDT for easy targets

| Server Name | IDDT (Easy Targets) |
|-------------|---------------------|
| Robetta     | 83.9±3.97           |
| SWISS-MODEL | 83.8±5.67           |
| RaptorX     | 81.8±4.96           |

|                    |            |
|--------------------|------------|
| IntFOLD4-TS        | 80.5±4.55  |
| IntFOLD3-TS**      | 80.4±4.26  |
| M4T**              | 77.9±6.22  |
| SPARKS-X           | 77.4±5.96  |
| NaiveBLAST**       | 73.4±6.47  |
| IntFOLD2-TS**      | 71.3±4.35  |
| Princeton_template | 70.4±9.30  |
| Phyre2**           | 67.8±10.33 |
| HHpredB*           | 60.4±4.74  |
| RBO Aleph*         | 47.9±16.85 |

We have split the targets by assigning difficulties based on the average global IDDT score across public and development servers applying the same criteria that are described in the main text. Analyzing the server performances across the three categories “hard”, “medium” and “easy” illustrates consistent performance for servers Robetta, RaptorX, IntFOLD3-TS and IntFOLD4-TS at all difficulty levels. For “hard” targets (Table S1-B) the largest spread of standard deviations of up to 15 IDDT units is observed. This is expected considering that some targets are modelled *de-novo* and many methods fail to submit predictions for some targets. In contrast for the “easy” targets (Table S1-D) the standard deviations remain smaller than 7 IDDT units for most servers. Methods such as SWISS-MODEL and M4T are clearly focusing on high quality modeling (Table S1-D). SWISS-MODEL is closely following Robetta for the “easy” targets, but exhibiting a clear gap to the top methods for categories “medium” (Table S1 – C) and even more pronounced for “hard”. The NaiveBlast server acts as a base line. For "easy" targets, it is on average 10 IDDT units behind the best servers, but it expectedly fails for harder targets (see methods for more details).s
